# Supplementary material for: Isolation and Characterization of an Unknown Process-Related Impurity in Furosemide and Validation of a New HPLC Method
Source: MDPI journal article supplement (doi:10.3390/molecules28052415), 2023-03-06
Supplement: s1 [file s1]

# Isolation and Characterization of an Unknown Process-Related Impurity in Furosemide and Validation of a New HPLC Method

Ao Xu <sup>1,2</sup>, Yunlin Xue <sup>1,2</sup>, Yuyu Zeng <sup>1,2</sup>, Jing Li <sup>1,2</sup>, Huiling Zhou <sup>1,2</sup>, Zhen Wang <sup>1,2</sup>,

Yin Chen <sup>1,2</sup>, Hui Chen <sup>3</sup>, Jian Jin <sup>1,2,\*</sup> and Tao Zhuang <sup>1,2,4,\*</sup>

<sup>1</sup> Jiangsu Key Laboratory of Marine Biological Resources and Environment, Jiangsu Key Laboratory of Marine Pharmaceutical Compound Screening, School of Pharmacy, Jiangsu Ocean University, Lianyungang 222005, China;

<sup>2</sup> Co-Innovation Center of Jiangsu Marine Bio-industry Technology, Jiangsu Ocean University, Lianyungang 222005, China

<sup>3</sup> Xuzhou Institute for Food and Drug Control, Xuzhou 221000, China;

<sup>4</sup> Department of Biomedical Engineering, College of Life Science and Technology, Huazhong University of Science and Technology, Wuhan 430074, China.

\* Correspondence: 2019000016@jou.edu.cn (J.J.); zhuang\_tao@hotmail.com (T.Z.);

## Supporting Information

## Table of contents

|                                                                                 |     |
|---------------------------------------------------------------------------------|-----|
| <b>Figure S1</b> The HR-ESI-MS spectrum of impurity G                           | P3  |
| <b>Figure S2</b> The IR spectrogram of furosemide and impurity G                | P4  |
| <b>Figure S3</b> The <sup>1</sup> H NMR spectrum of impurity G                  | P5  |
| <b>Figure S4</b> The <sup>13</sup> C NMR spectrum of impurity G                 | P5  |
| <b>Figure S5</b> The DEPT spectrum of impurity G                                | P6  |
| <b>Figure S6</b> The <sup>1</sup> H- <sup>1</sup> H COSY spectrum of impurity G | P6  |
| <b>Figure S7</b> The HSQC spectrum of impurity G                                | P7  |
| <b>Figure S8</b> The HMBC spectrum of impurity G                                | P7  |
| <b>Figure S9</b> The HPLC chromatograms of different types of HPLC columns      | P8  |
| <b>Table S1</b> Results for robustness study of impurity A–G                    | P9  |
| <b>Table S2</b> Results for robustness study (flow rate, ± 0.1 mL/min)          | P10 |
| <b>Table S3</b> Results for robustness study (column oven temperature, ± 3 °C ) | P11 |
| <b>Table S4</b> Results for robustness study (pH of buffer solution, ± 0.1)     | P12 |
| <b>Table S5</b> Results for robustness study (mobile phase composition, ± 2%)   | P13 |
| <b>Table S6</b> In silico toxicity prediction of furosemide and impurity G      | P14 |

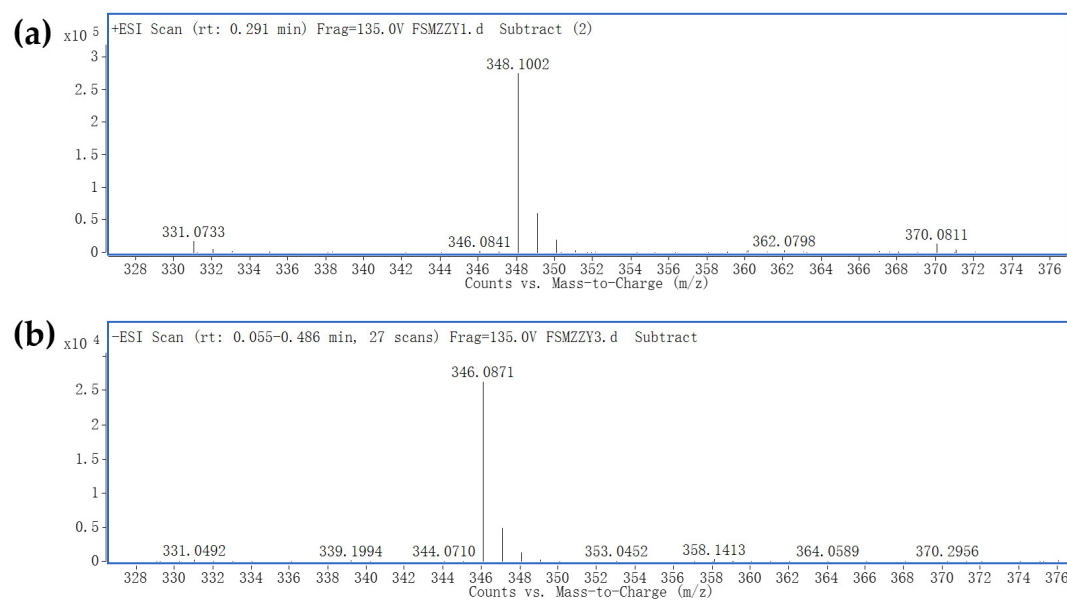

**Figure S1** The HR-ESI-MS spectrum of impurity G

**(a)** The HR-ESI-MS spectrum of impurity G in positive ion mode

**(b)** The HR-ESI-MS spectrum of impurity G in negative ion mode

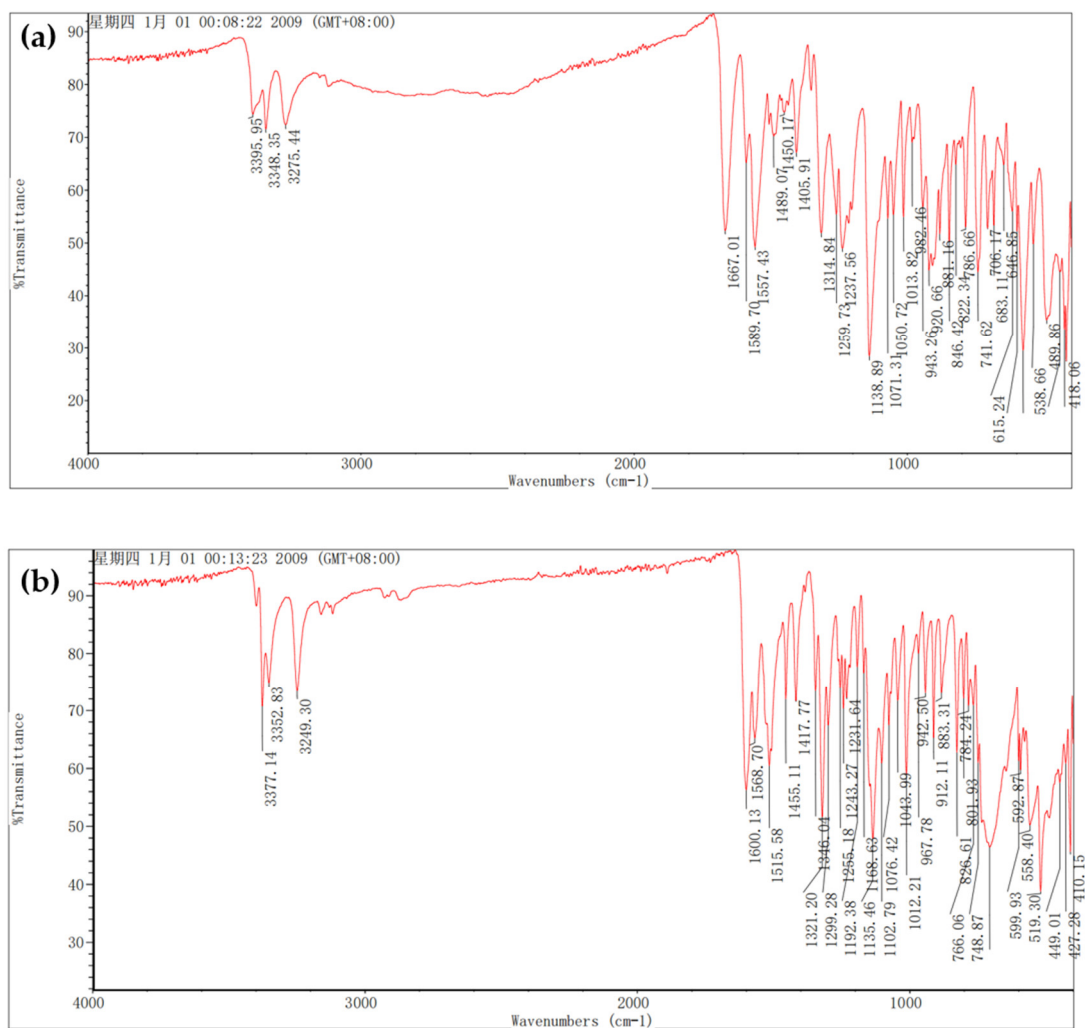

**Figure S2** The IR spectra of furosemide and impurity G

**(a)** The IR spectrum of furosemide

**(b)** The IR spectrum of impurity G

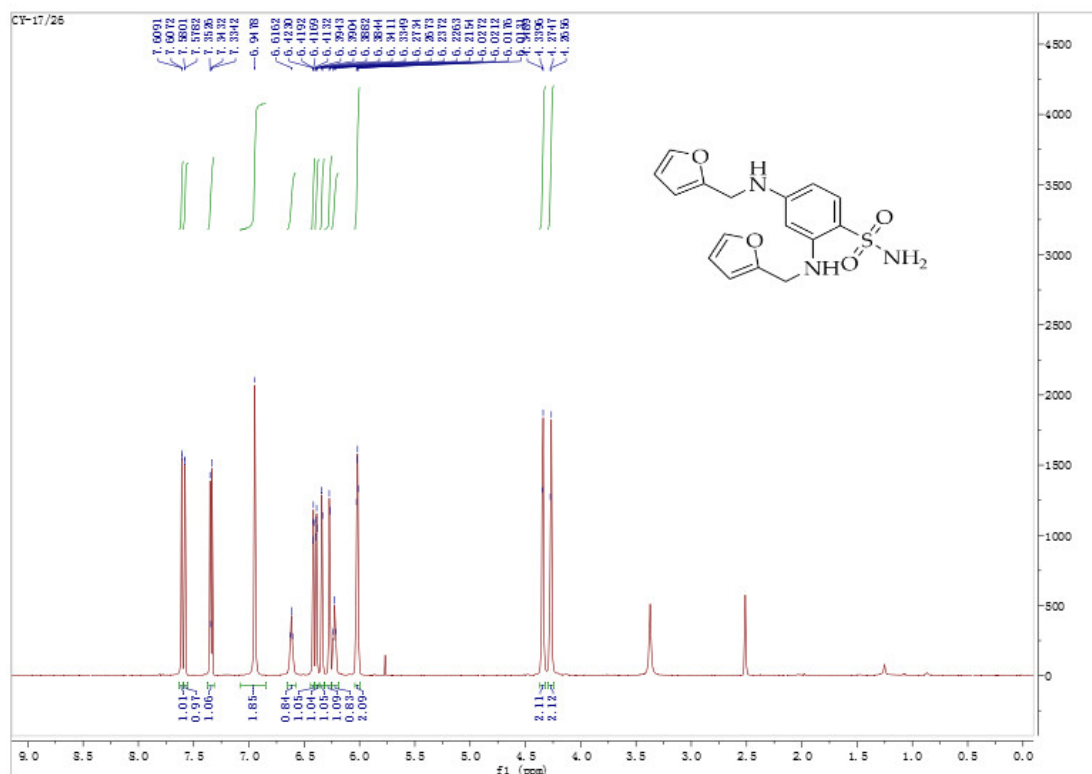

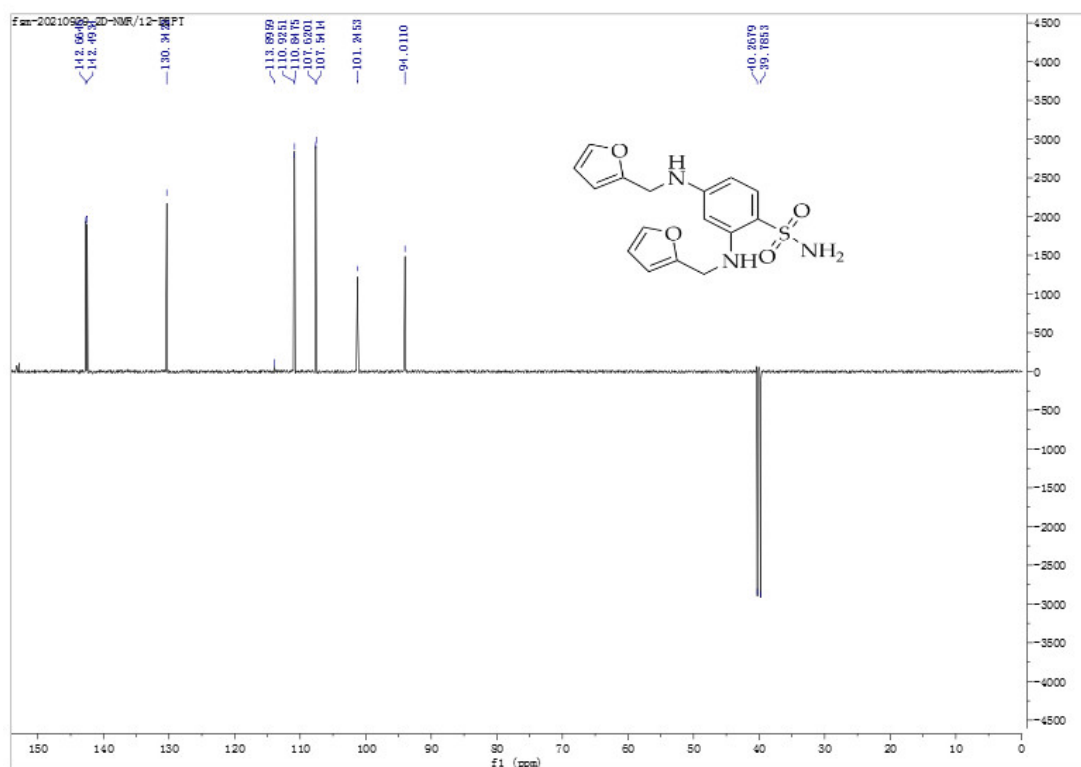

**Figure S5** The DEPT spectrum of impurity G

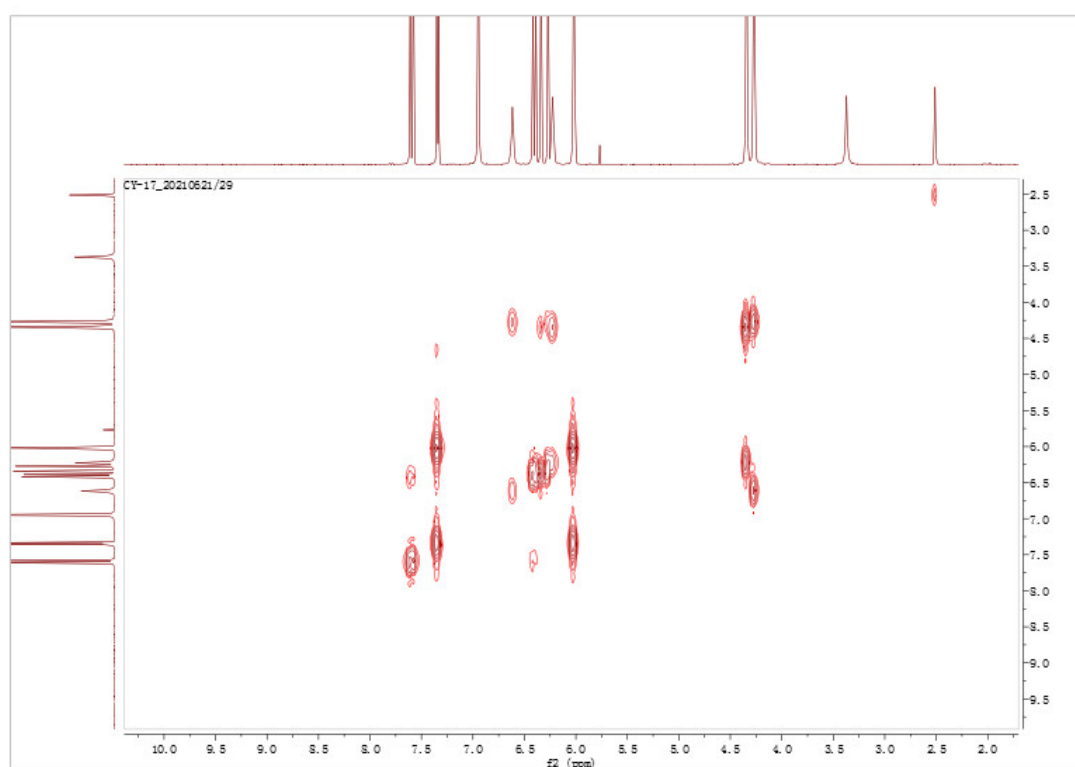

**Figure S6** The <sup>1</sup>H-<sup>1</sup>H COSY spectrum of impurity G

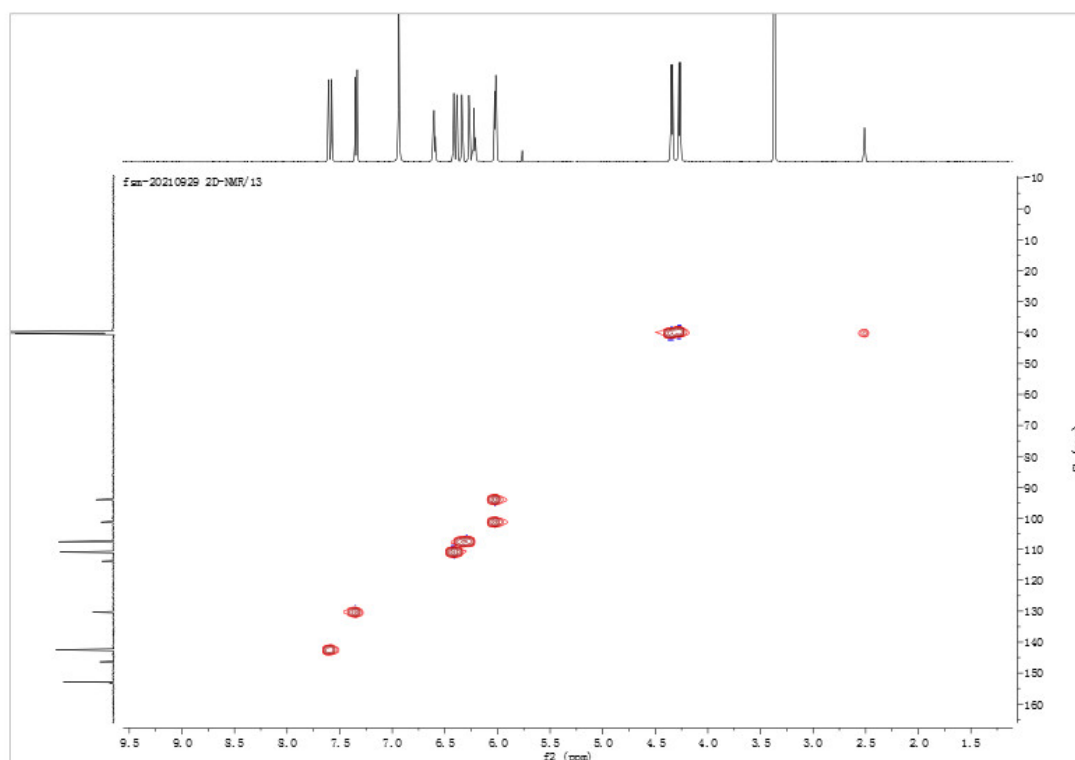

**Figure S7** The HSQC spectrum of impurity G

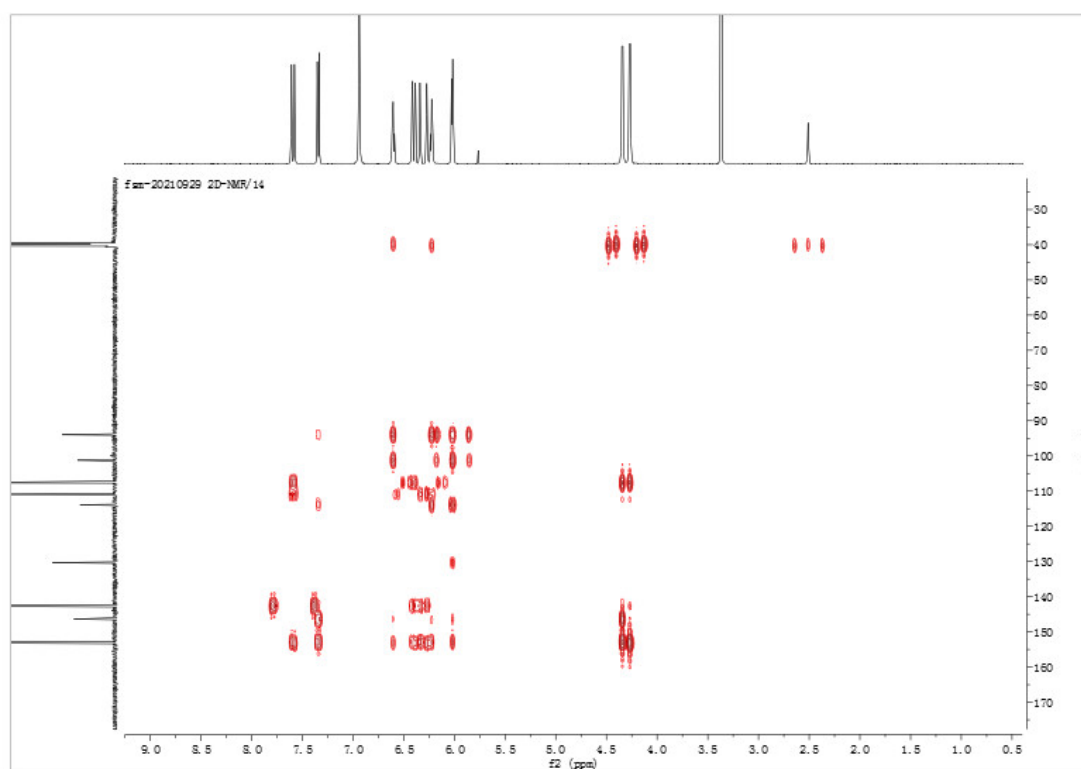

**Figure S8** The HMBC spectrum of impurity G

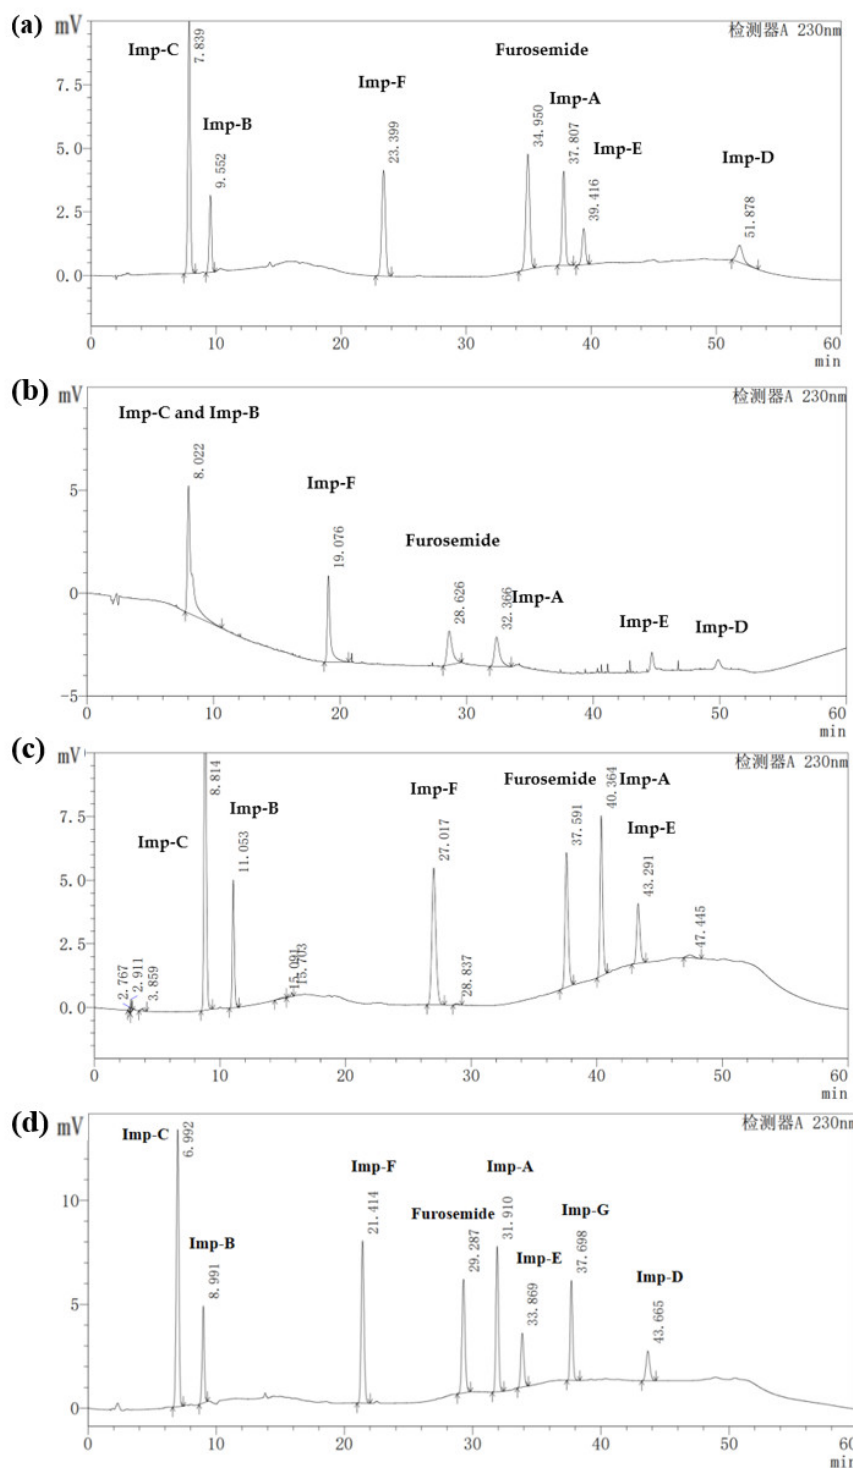

**Figure S9** The HPLC chromatograms of different types of HPLC columns

**(a)** The HPLC chromatogram of Shimadzu GL Inertsustain C<sub>18</sub> (150 × 4.6 mm, 5μm) column

**(b)** The HPLC chromatogram of Waters XBridge ShieldRP C<sub>18</sub> (150 × 4.6 mm, 5μm) column

**(c)** The HPLC chromatogram of Agilent Eclipse XDB C<sub>18</sub> (250 × 4.6 mm, 5μm) column

**(d)** The HPLC chromatogram of Agilent Eclipse XDB C<sub>18</sub> (150 × 4.6 mm, 5μm) column



**Table S1** Results for robustness study of impurity A–G

| Parameter<br>Altered | Variation   | Content of impurity A–G (%) |       |       |       |       |       |       |
|----------------------|-------------|-----------------------------|-------|-------|-------|-------|-------|-------|
|                      |             | Imp-A                       | Imp-B | Imp-C | Imp-D | Imp-E | Imp-F | Imp-G |
| Normal conditions *  |             | 0.14                        | 0.14  | 0.14  | 0.14  | 0.14  | 0.13  | 0.13  |
| Flow rate            | - 0.1mL/min | 0.14                        | 0.14  | 0.14  | 0.14  | 0.14  | 0.14  | 0.13  |
|                      | + 0.1mL/min | 0.14                        | 0.14  | 0.14  | 0.14  | 0.14  | 0.14  | 0.14  |
| Column oven          | - 3 °C      | 0.13                        | 0.14  | 0.14  | 0.14  | 0.14  | 0.14  | 0.14  |
| Temperature          | + 3 °C      | 0.14                        | 0.14  | 0.14  | 0.14  | 0.14  | 0.14  | 0.14  |
| pH                   | - 0.1       | 0.14                        | 0.15  | 0.14  | 0.14  | 0.14  | 0.13  | 0.13  |
|                      | + 0.1       | 0.14                        | 0.15  | 0.14  | 0.14  | 0.14  | 0.13  | 0.13  |
| %Organic in          | - 2%        | 0.14                        | 0.15  | 0.14  | 0.14  | 0.14  | 0.14  | 0.13  |
| Mobile phase A       | + 2%        | 0.14                        | 0.15  | 0.14  | 0.14  | 0.14  | 0.14  | 0.13  |
| %Organic in          | - 2%        | 0.14                        | 0.14  | 0.14  | 0.14  | 0.14  | 0.14  | 0.13  |
| Mobile phase B       | + 2%        | 0.14                        | 0.14  | 0.14  | 0.14  | 0.14  | 0.14  | 0.13  |

\* The normal conditions was described in section 3.2.

**Table S2** Results for robustness study (flow rate,  $\pm 0.1$  mL/min)

| Flow<br>(mL/min) | Compound   | System suitability |          |                       |                    |            |
|------------------|------------|--------------------|----------|-----------------------|--------------------|------------|
|                  |            | RRT (min)          | RT (min) | Theoretical<br>plates | Symmetry<br>factor | Resolution |
| 0.7              | Imp C      | 0.27               | 8.441    | 7,567                 | 0.933              | -          |
|                  | Imp B      | 0.34               | 10.807   | 17,425                | 0.920              | 6.544      |
|                  | Imp F      | 0.75               | 23.997   | 44,604                | 1.035              | 34.033     |
|                  | Furosemide | 1.00               | 31.844   | 104,702               | 1.056              | 18.539     |
|                  | Imp A      | 1.07               | 34.228   | 154,939               | 1.053              | 6.452      |
|                  | Imp E      | 1.15               | 36.50    | 123,688               | 1.088              | 11.997     |
|                  | Imp G      | 1.27               | 40.499   | 163,554               | 1.117              | 14.707     |
|                  | Imp D      | 1.46               | 46.639   | 93,079                | 1.047              | 6.021      |
| 0.9              | Imp C      | 0.24               | 6.700    | 6,843                 | 0.941              | -          |
|                  | Imp B      | 0.31               | 8.652    | 13,913                | 0.935              | 6.478      |
|                  | Imp F      | 0.73               | 20.255   | 45,835                | 1.057              | 34.744     |
|                  | Furosemide | 1.00               | 27.886   | 58,481                | 1.019              | 18.234     |
|                  | Imp A      | 1.10               | 30.633   | 107,382               | 1.053              | 6.616      |
|                  | Imp E      | 1.16               | 32.37    | 88,405                | 0.999              | 4.226      |
|                  | Imp G      | 1.29               | 36.029   | 148,050               | 1.065              | 13.225     |
|                  | Imp D      | 1.50               | 41.754   | 110,642               | 1.055              | 5.847      |

**Table S3** Results for robustness study (column oven temperature,  $\pm 3$  °C )

| Temperature<br>(°C) | Compound   | System suitability |          |                       |                    |            |
|---------------------|------------|--------------------|----------|-----------------------|--------------------|------------|
|                     |            | RRT (min)          | RT (min) | Theoretical<br>plates | Symmetry<br>factor | Resolution |
| 32                  | Imp C      | 0.26               | 7.820    | 8,697                 | 0.962              | -          |
|                     | Imp B      | 0.31               | 9.548    | 15,159                | 0.979              | 5.416      |
|                     | Imp F      | 0.74               | 22.751   | 41,799                | 1.080              | 35.068     |
|                     | Furosemide | 1.00               | 30.659   | 96,195                | 1.098              | 18.918     |
|                     | Imp A      | 1.08               | 33.066   | 143,891               | 1.069              | 6.413      |
|                     | Imp E      | 1.13               | 34.62    | 109,152               | 1.092              | 3.972      |
|                     | Imp G      | 1.27               | 38.998   | 128,444               | 1.113              | 13.666     |
|                     | Imp D      | 1.48               | 45.351   | 89,852                | 1.044              | 5.483      |
| 38                  | Imp C      | 0.24               | 6.971    | 5,803                 | 0.854              | -          |
|                     | Imp B      | 0.32               | 9.179    | 13,535                | 0.867              | 6.493      |
|                     | Imp F      | 0.74               | 21.048   | 49,307                | 1.039              | 34.212     |
|                     | Furosemide | 1.00               | 28.561   | 63,138                | 1.034              | 18.019     |
|                     | Imp A      | 1.10               | 31.307   | 112,539               | 1.035              | 6.492      |
|                     | Imp E      | 1.17               | 33.35    | 95,478                | 1.011              | 5.177      |
|                     | Imp G      | 1.29               | 36.932   | 133,651               | 1.071              | 14.060     |
|                     | Imp D      | 1.49               | 42.511   | 116,857               | 1.038              | 5.839      |

**Table S4** Results for robustness study (pH of buffer solution,  $\pm 0.1$ ).

| pH  | Compound   | System suitability |          |                    |                 |            |
|-----|------------|--------------------|----------|--------------------|-----------------|------------|
|     |            | RRT (min)          | RT (min) | Theoretical plates | Symmetry factor | Resolution |
| 2.9 | Imp C      | 0.25               | 7.475    | 7,372              | 0.938           | -          |
|     | Imp B      | 0.33               | 9.824    | 17,008             | 1.001           | 7.184      |
|     | Imp F      | 0.74               | 21.859   | 46,961             | 1.063           | 34.300     |
|     | Furosemide | 1.00               | 29.688   | 82,180             | 1.034           | 19.159     |
|     | Imp A      | 1.09               | 32.239   | 133,980            | 1.042           | 6.682      |
|     | Imp E      | 1.17               | 34.65    | 112,882            | 1.025           | 6.300      |
|     | Imp G      | 1.26               | 37.394   | 125,804            | 1.044           | 15.259     |
|     | Imp D      | 1.46               | 43.475   | 105,508            | 1.018           | 6.150      |
| 3.1 | Imp C      | 0.25               | 7.148    | 6,529              | 0.941           | -          |
|     | Imp B      | 0.29               | 8.551    | 10,495             | 0.904           | 4.095      |
|     | Imp F      | 0.73               | 21.432   | 48,062             | 1.041           | 35.647     |
|     | Furosemide | 1.00               | 29.171   | 71,538             | 1.031           | 18.753     |
|     | Imp A      | 1.09               | 31.695   | 118,656            | 1.029           | 6.358      |
|     | Imp E      | 1.11               | 32.45    | 83,897             | 1.027           | 1.828      |
|     | Imp G      | 1.27               | 36.908   | 129,621            | 1.037           | 15.840     |
|     | Imp D      | 1.50               | 43.776   | 101,838            | 1.043           | 6.296      |

**Table S5** Results for robustness study (mobile phase composition,  $\pm 2\%$ )

| Mobile phase composition         | Compound   | System suitability |             |                       |                    |            |
|----------------------------------|------------|--------------------|-------------|-----------------------|--------------------|------------|
|                                  |            | RRT<br>(min)       | RT<br>(min) | Theoretical<br>plates | Symmetry<br>factor | Resolution |
| %Organic<br>in Mobile<br>phase A | Imp C      | 0.25               | 7.489       | 7,395                 | 0.915              | -          |
|                                  | Imp B      | 0.31               | 9.143       | 13,141                | 0.911              | 4.905      |
|                                  | Imp F      | 0.74               | 21.742      | 46,649                | 1.078              | 35.036     |
|                                  | Furosemide | 1.00               | 29.474      | 77,334                | 1.068              | 18.711     |
|                                  | Imp A      | 1.08               | 31.958      | 126,478               | 1.090              | 6.449      |
|                                  | Imp E      | 1.13               | 33.25       | 95,851                | 1.145              | 3.304      |
|                                  | Imp G      | 1.26               | 37.278      | 118,640               | 1.104              | 14.988     |
|                                  | Imp D      | 1.47               | 43.412      | 110,129               | 1.057              | 5.694      |
|                                  | Imp C      | 0.24               | 6.706       | 5,063                 | 0.897              | -          |
|                                  | Imp B      | 0.29               | 8.350       | 9,574                 | 0.886              | 4.664      |
|                                  | Imp F      | 0.73               | 20.809      | 48,736                | 1.093              | 34.986     |
|                                  | Furosemide | 1.00               | 28.408      | 58,286                | 1.091              | 17.932     |
|                                  | Imp A      | 1.10               | 31.170      | 103,329               | 1.095              | 6.413      |
|                                  | Imp E      | 1.14               | 32.46       | 82,222                | 1.048              | 3.029      |
|                                  | Imp G      | 1.29               | 36.596      | 108,149               | 1.061              | 14.499     |
|                                  | Imp D      | 1.51               | 42.981      | 110,384               | 1.042              | 5.952      |
| %Organic<br>in Mobile<br>phase B | Imp C      | 0.26               | 7.430       | 7,082                 | 0.937              | -          |
|                                  | Imp B      | 0.32               | 9.056       | 12,802                | 0.927              | 4.817      |
|                                  | Imp F      | 0.74               | 21.097      | 49,216                | 1.080              | 34.553     |
|                                  | Furosemide | 1.00               | 28.575      | 65,597                | 1.074              | 18.143     |
|                                  | Imp A      | 1.09               | 31.192      | 114,153               | 1.079              | 6.360      |
|                                  | Imp E      | 1.14               | 32.56       | 89,141                | 1.127              | 3.406      |
|                                  | Imp G      | 1.26               | 36.136      | 122,087               | 1.083              | 14.010     |
|                                  | Imp D      | 1.47               | 41.905      | 127,114               | 1.062              | 5.314      |
|                                  | Imp C      | 0.25               | 7.568       | 7,130                 | 0.929              | -          |
|                                  | Imp B      | 0.30               | 9.249       | 12,995                | 0.885              | 4.898      |
|                                  | Imp F      | 0.74               | 22.562      | 43,374                | 1.094              | 35.332     |
|                                  | Furosemide | 1.00               | 30.442      | 90,600                | 1.088              | 18.701     |
|                                  | Imp A      | 1.08               | 32.816      | 139,811               | 1.077              | 6.335      |
|                                  | Imp E      | 1.12               | 33.98       | 101,714               | 1.038              | 2.989      |
|                                  | Imp G      | 1.20               | 36.665      | 108,728               | 1.050              | 13.469     |
|                                  | Imp D      | 1.50               | 45.552      | 91,305                | 1.079              | 22.504     |

**Table S6** In silico toxicity prediction of furosemide and impurity G

| Classification                            | Target                                           | Furosemide |             | Impurity G |             |
|-------------------------------------------|--------------------------------------------------|------------|-------------|------------|-------------|
|                                           |                                                  | Prediction | probability | Prediction | probability |
| Oral toxicity                             | LD <sub>50</sub> (mg/kg)                         | 2000       | –           | 3000       | –           |
|                                           | Toxicity Class                                   | 4          | –           | 5          | –           |
| Organ toxicity                            | Hepatotoxicity                                   | Inactive   | 0.51        | Inactive   | 0.64        |
| Toxicity endpoints                        | Carcinogenicity                                  | Inactive   | 0.62        | Inactive   | 0.53        |
|                                           | Mutagenicity                                     | Inactive   | 0.89        | Inactive   | 0.73        |
|                                           | Immunotoxicity                                   | Inactive   | 0.99        | Inactive   | 0.93        |
|                                           | Cytotoxicity                                     | Inactive   | 0.59        | Inactive   | 0.58        |
|                                           | Aryl hydrocarbon receptor                        | Inactive   | 0.97        | Inactive   | 0.92        |
| Tox21-Nuclear receptor signaling pathways | Androgen receptor                                | Inactive   | 0.97        | Inactive   | 0.93        |
|                                           | Androgen receptor ligand binding domain          | Inactive   | 0.98        | Inactive   | 0.94        |
|                                           | Aromatase                                        | Inactive   | 0.98        | Inactive   | 0.97        |
|                                           | Estrogen receptor alpha                          | Inactive   | 0.76        | Inactive   | 0.88        |
|                                           | Estrogen receptor ligand binding domain          | Inactive   | 0.94        | Inactive   | 0.97        |
|                                           | Peroxisome proliferator activated receptor gamma | Inactive   | 0.96        | Inactive   | 0.98        |
|                                           | Antioxidant responsive element                   | Inactive   | 0.99        | Inactive   | 0.98        |
| Tox21-Stress response pathways            | Heat shock factor response element               | Inactive   | 0.99        | Inactive   | 0.98        |
|                                           | Mitochondrial membrane potential                 | Inactive   | 0.96        | Inactive   | 0.93        |
|                                           | Phosphoprotein p53                               | Inactive   | 0.96        | Inactive   | 0.92        |
|                                           | ATPase family AAA domain-containing protein 5    | Inactive   | 0.99        | Inactive   | 0.97        |
